# Supplementary material
Source: PubMed Central journal article supplement (PMC4568134)
Supplement: NIHMS701070-supplement-01.pdf [file NIHMS701070-supplement-01.pdf]

Before beginning the survey, please tell us about yourself.

**\* 1. I am a...**

Illinois school nurse  
School health aid  
School administrator  
None of the above

**\* 2. While working at your current school, have any students/staff experienced a severe allergic reaction?**

Yes  
No  
Unsure

**\* 3. How confident do you feel about your ability to react to a child who is having a food allergy reaction?**

Not confident  
Fairly confident  
Confident  
Unsure

**\* 4. How much of your confidence is due to your district's food allergy policy?**

Most  
Some  
None  
Not applicable/no policy

**\* 5. Do you feel you still need additional training to be able to manage a child who is having a food allergy reaction?**

Yes  
No

**\* 6. Does your district have a new policy on maintaining a supply of epinephrine (undesignated EpiPens) in your school?**

Yes  
No  
Unsure

**\* 7. Do you support this new policy?**

Yes  
Indifferent  
No, because \_\_\_\_\_

**\* 8. Do you think children with food allergy are now safer in schools due to this new policy?**

Yes  
Indifferent  
No, because \_\_\_\_\_

**\* 9. Is this new policy sufficient to keep children with food allergy safe in schools?**

Yes  
Indifferent  
No, because \_\_\_\_\_

**\* 10. Is there any part of the policy that bothers you?**

No  
Indifferent  
Yes, \_\_\_\_\_

**\* 11. How can the new policy be improved?**

FIGURE E1. Survey questions. The survey was administered via [surveymonkey.com](https://www.surveymonkey.com).

The policy is fine  
Indifferent  
The policy can be improved by \_\_\_\_\_

**\* 12. Is there a written plan or protocol in place at your school which outlines what staff are to do if a child is having a severe allergic reaction?**

Yes  
No  
Unsure

**\* 13. General food allergy knowledge**

|                                                                                   | True                                                                                   | False                                                                                   | I don't know                                                                                   |
|-----------------------------------------------------------------------------------|----------------------------------------------------------------------------------------|-----------------------------------------------------------------------------------------|------------------------------------------------------------------------------------------------|
| Asthma is an important risk factor for severe allergic reactions.                 | Asthma is an important risk factor for severe allergic reactions. True                 | Asthma is an important risk factor for severe allergic reactions. False                 | Asthma is an important risk factor for severe allergic reactions. I don't know                 |
| A child can die from a milk allergy reaction.                                     | A child can die from a milk allergy reaction. True                                     | A child can die from a milk allergy reaction. False                                     | A child can die from a milk allergy reaction. I don't know                                     |
| Teenagers are at higher risk for fatal food allergy compared to younger children. | Teenagers are at higher risk for fatal food allergy compared to younger children. True | Teenagers are at higher risk for fatal food allergy compared to younger children. False | Teenagers are at higher risk for fatal food allergy compared to younger children. I don't know |
| Taking a daily antihistamine is effective for preventing a food allergy reaction. | Taking a daily antihistamine is effective for preventing a food allergy reaction. True | Taking a daily antihistamine is effective for preventing a food allergy reaction. False | Taking a daily antihistamine is effective for preventing a food allergy reaction. I don't know |

**\* 14. Which of the following doses of epinephrine (i.e. EpiPen) would you administer to a child who weighs 60 lbs (27kg)?**

0.15 mg of epinephrine (i.e. EpiPen Jr.)  
0.3 mg of epinephrine (i.e. EpiPen)  
Neither of the above  
I don't know

**\* 15. Which location do you instruct your patients to inject epinephrine (i.e.**

|                                                                                                        | Agree                                                                                                        | Disagree                                                                                                        | Indifferent                                                              |
|--------------------------------------------------------------------------------------------------------|--------------------------------------------------------------------------------------------------------------|-----------------------------------------------------------------------------------------------------------------|--------------------------------------------------------------------------|
| Most people in my school take food allergy seriously.                                                  | Most people in my school take food allergy seriously. Agree                                                  | Most people in my school take food allergy seriously. Disagree                                                  | Most people in my school take food allergy seriously. Indifferent        |
| Children with food allergies are teased at school.                                                     | Children with food allergies are teased at school. Agree                                                     | Children with food allergies are teased at school. Disagree                                                     | Children with food allergies are teased at school. Indifferent           |
| All classrooms should be nut-free (e.g. peanuts, tree nuts).                                           | All classrooms should be nut-free (e.g. peanuts, tree nuts). Agree                                           | All classrooms should be nut-free (e.g. peanuts, tree nuts). Disagree                                           | All classrooms should be nut-free (e.g. peanuts, tree nuts). Indifferent |
| Elementary schools should have special tables where children with food allergies can safely eat lunch. | Elementary schools should have special tables where children with food allergies can safely eat lunch. Agree | Elementary schools should have special tables where children with food allergies can safely eat lunch. Disagree | Elementary schools should have special                                   |

FIGURE E1. (Continued).

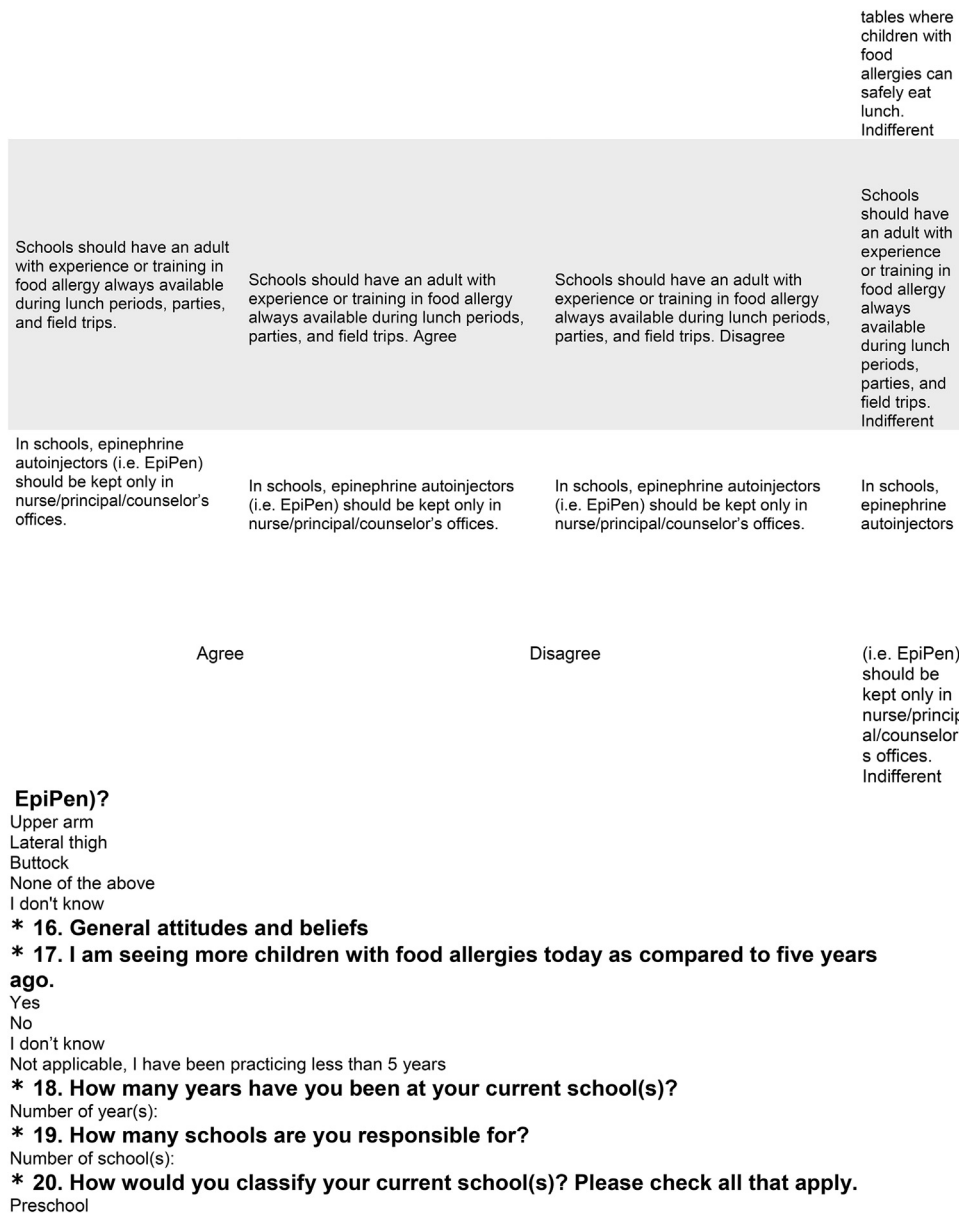

FIGURE E1. (Continued).

Elementary school  
Middle school  
Junior high school  
High school

**\* 21. How would you classify your current school(s)?**

Rural  
Suburban  
Urban

**\* 22. What is your gender?**

Male  
Female

**\* 23. How old are you?**

18 – 24  
45 - 65

25 – 44  
Over 65

**\* 24. What is your race/ethnicity? Mark all that apply.**

White  
African American  
Hispanic or Latino  
Asian  
Other (please specify)

**\* 25. What is the highest education level you have completed?**

Less than high school  
High school  
2 year college  
4 year college  
Graduate degree

**\* 26. Please tell us about your staff's training on food allergy.**

|                                                                                                                               | Not confident                                                                                                                               | Fairly confident                                                                                                                               | Confident                                                                                                                               | Unsure                                                                                                                               |
|-------------------------------------------------------------------------------------------------------------------------------|---------------------------------------------------------------------------------------------------------------------------------------------|------------------------------------------------------------------------------------------------------------------------------------------------|-----------------------------------------------------------------------------------------------------------------------------------------|--------------------------------------------------------------------------------------------------------------------------------------|
| How confident do you feel that a severe allergic reaction would be recognized by your staff?                                  | How confident do you feel that a severe allergic reaction would be recognized by your staff? Not confident                                  | How confident do you feel that a severe allergic reaction would be recognized by your staff? Fairly confident                                  | How confident do you feel that a severe allergic reaction would be recognized by your staff? Confident                                  | How confident do you feel that a severe allergic reaction would be recognized by your staff? Unsure                                  |
| How confident do you feel that your staff would know what to do if a student had a severe allergic reaction IN THE CLASSROOM? | How confident do you feel that your staff would know what to do if a student had a severe allergic reaction IN THE CLASSROOM? Not confident | How confident do you feel that your staff would know what to do if a student had a severe allergic reaction IN THE CLASSROOM? Fairly confident | How confident do you feel that your staff would know what to do if a student had a severe allergic reaction IN THE CLASSROOM? Confident | How confident do you feel that your staff would know what to do if a student had a severe allergic reaction IN THE CLASSROOM? Unsure |

FIGURE E1. (Continued).

|                                                                                                                                |                                                                                                                                              |                                                                                                                                                 |                                                                                                                                          |                                                                                                                                       |
|--------------------------------------------------------------------------------------------------------------------------------|----------------------------------------------------------------------------------------------------------------------------------------------|-------------------------------------------------------------------------------------------------------------------------------------------------|------------------------------------------------------------------------------------------------------------------------------------------|---------------------------------------------------------------------------------------------------------------------------------------|
| How confident do you feel that your staff would know what to do if a student had a severe allergic reaction ON A FIELD TRIP?   | How confident do you feel that your staff would know what to do if a student had a severe allergic reaction ON A FIELD TRIP? Not confident   | How confident do you feel that your staff would know what to do if a student had a severe allergic reaction ON A FIELD TRIP? Fairly confident   | How confident do you feel that your staff would know what to do if a student had a severe allergic reaction ON A FIELD TRIP? Confident   | How confident do you feel that your staff would know what to do if a student had a severe allergic reaction ON A FIELD TRIP? Unsure   |
| How confident do you feel that your staff would know what to do if a student had a severe allergic reaction ON THE PLAYGROUND? | How confident do you feel that your staff would know what to do if a student had a severe allergic reaction ON THE PLAYGROUND? Not confident | How confident do you feel that your staff would know what to do if a student had a severe allergic reaction ON THE PLAYGROUND? Fairly confident | How confident do you feel that your staff would know what to do if a student had a severe allergic reaction ON THE PLAYGROUND? Confident | How confident do you feel that your staff would know what to do if a student had a severe allergic reaction ON THE PLAYGROUND? Unsure |
| How confident do you feel that your staff would know what to do if a student had a severe allergic reaction IN THE CAFETERIA?  | How confident do you feel that your staff would know what to do if a student had a severe allergic reaction IN THE CAFETERIA? Not confident  | How confident do you feel that your staff would know what to do if a student had a severe allergic reaction IN THE CAFETERIA? Fairly confident  | How confident do you feel that your staff would know what to do if a student had a severe allergic reaction IN THE CAFETERIA? Confident  | How confident do you feel that your staff would know what to do if a student had a severe allergic reaction IN THE CAFETERIA? Unsure  |
| How confident do you feel that your staff would know what to do if a student had a severe allergic reaction ON THE BUS?        | How confident do you feel that your staff would know what to do if a student had a severe allergic reaction ON THE BUS? Not confident        | How confident do you feel that your staff would know what to do if a student had a severe allergic reaction ON THE BUS? Fairly confident        | How confident do you feel that your staff would know what to do if a student had a severe allergic reaction ON THE BUS? Confident        | How confident do you feel that your staff would know what to do if a student had a severe allergic reaction ON THE BUS? Unsure        |

**\* 27. In your absence, who would manage a severe allergy emergency?**  
 Administrator  
 Teacher  
 Substitute nurse  
 Non-teaching staff  
 Other (please specify)

**\* 28. Has your principal asked you (or expects you) to provide food allergy education to the staff?**  
 Yes  
 No

FIGURE E1. (Continued).

**\* 29. How confident would you feel in providing food allergy training at your school in the next month?**

Not confident  
Fairly confident  
Confident  
Unsure

**\* 30. Have you provided food allergy training for school staff within the past year?**

Yes  
No

**\* 31. How much time are you given to provide food allergy training?**

Minutes per year:

**\* 32. During training, each staff member is asked to demonstrate correct epinephrine administration technique with a training device.**

None of the time  
Some of the time  
Most of the time

**\* 33. Has your principal asked you (or expects you) to conduct an anaphylaxis drill?**

Yes  
No

**\* 34. How confident would you feel in leading an anaphylaxis drill at your school in the next month?**

Not confident  
Fairly confident  
Confident  
Unsure

**\* 35. Have you conducted anaphylaxis drills within the past year?**

Yes  
No

**\* 36. Please briefly describe your anaphylaxis drills.**

**\* 37. Who do you think should be part of an anaphylaxis drill? Mark all that apply.**

Principal  
Assistant Principal  
Office staff  
Students  
Classroom teacher  
Cafeteria monitor  
Cafeteria staff  
Other (please specify)

**\* 38. Who should be in charge of running a drill in the school?**

Principal  
Nurse  
Other (please specify)

**39. What are the biggest barriers to conducting anaphylaxis drills in your school?**

**40. What are the biggest things that would help you conduct anaphylaxis drills in your school?**

**\* 41. Would an online module outlining steps to conduct, record and evaluate an anaphylaxis drill be helpful for you?**

Yes  
No  
Unsure

**42. Do you have any comments about this survey?**

FIGURE E1. (Continued).

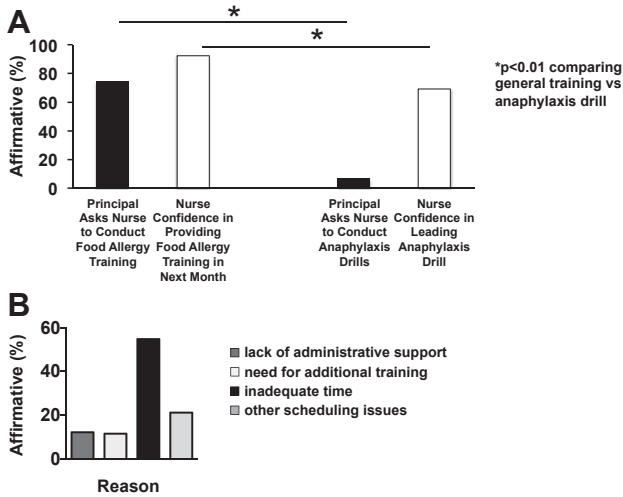

**FIGURE E2.** Food allergy training in Illinois schools. **A**, With regard to education, general food allergy training is most often provided. Despite the request for anaphylaxis drills in the State Guidelines, they were rarely asked for or conducted, and nurses report decreased confidence in leading an anaphylaxis drill compared with general training (black bars = asked by principal, white bars = nurse confidence). **B**, Nurses' perceived barriers to conducting anaphylaxis drills despite inclusion in the Illinois State Guidelines. There was no difference between community types or school level. \* $P < .01$  compares principal requests and nurse confidence in conducting food allergy training vs anaphylaxis drills.

**TABLE E1.** School description; total percentages are greater than 100 because nurses typically covered more than 1 school

|                            | N = 1012 | Percentage |
|----------------------------|----------|------------|
| Location of current school |          |            |
| Suburban                   | 662      | 65.4       |
| Rural                      | 225      | 22.2       |
| Urban                      | 125      | 12.4       |
| Level of current school    |          |            |
| Preschool                  | 405      | 40         |
| Elementary                 | 713      | 70.5       |
| Middle school              | 422      | 41.7       |
| Junior high                | 286      | 28.3       |
| High school                | 337      | 33.3       |

**TABLE E2.** Failure to give epinephrine

| Community type | No epinephrine given (total n) | Epinephrine not available (n, %) | Benadryl only given (n, %) | Reason not specified (n, %) |
|----------------|--------------------------------|----------------------------------|----------------------------|-----------------------------|
| Rural          | 7                              | 6 (85.7%)                        | 1 (14.3%)                  | 0 (0%)                      |
| Urban          | 4                              | 2 (50%)                          | 2 (50%)                    | 0 (0%)                      |
| Suburban       | 17                             | 8 (47%)                          | 5 (29.4%)                  | 3 (17.6%)                   |

**TABLE E3.** High risk areas of concern for food allergy reactions: nurse confidence in staff's ability to handle a severe allergic reaction by community type and student age

| How confident do you feel that your staff would know what to do if a student had a severe allergic reaction... | Total respondents not confident or unsure (%) | Preschool/elementary school (n, %) | Middle/junior high school (n, %) | High school (n, %) | <i>P</i> value |
|----------------------------------------------------------------------------------------------------------------|-----------------------------------------------|------------------------------------|----------------------------------|--------------------|----------------|
| In the classroom                                                                                               | 68 (15.9)                                     | 30                                 | 21                               | 17                 | .67            |
| On a field trip                                                                                                | 70 (16.3)                                     | 20 (23.0)                          | 40 (15.2)                        | 10 (20.4)          | .29            |
| On the playground                                                                                              | 62 (14.5)                                     | 19 (43.0)                          | 31 (45.0)                        | 12 (36.7)          | .72            |
| In the cafeteria                                                                                               | 33 (7.8)                                      | 13 (14.9)                          | 25 (9.6)                         | 5 (10.9)           | .17            |
| On the school bus                                                                                              | 196 (45.7)                                    | 41 (47.7)                          | 124 (47.7)                       | 31 (64.6)          | .047           |

  

| How confident do you feel that your staff would know what to do if a student had a severe allergic reaction... | Total respondents not confident or unsure (%) | Rural school respondents (%) | Suburban school respondents (%) | Urban school respondents (%) | <i>P</i> value |
|----------------------------------------------------------------------------------------------------------------|-----------------------------------------------|------------------------------|---------------------------------|------------------------------|----------------|
| In the classroom                                                                                               | 45 (11.1)                                     | 15 (13.9)                    | 23 (9.5)                        | 7 (10.8)                     | .034           |
| On a field trip                                                                                                | 70 (17.2)                                     | 20 (18.5)                    | 40 (16.4)                       | 10 (15.4)                    | .29            |
| On the playground                                                                                              | 62 (15.3)                                     | 19 (17.6)                    | 31 (12.8)                       | 12 (36.7)                    | .72            |
| In the cafeteria                                                                                               | 33 (8.1)                                      | 13 (12.0)                    | 25 (10.3)                       | 5 (18.5)                     | .17            |
| On the school bus                                                                                              | 196 (48.2)                                    | 41 (37.9)                    | 124 (51.0)                      | 31 (47.7)                    | .047           |
